# Supplementary material for: The Interconnected Relationship between Auxin Concentration Gradient Changes in Chinese Fir Radial Stems and Dynamic Cambial Activity
Source: MDPI journal article supplement (doi:10.3390/f13101698), 2022-10-15
Supplement: s1 [file s1]

**Figure S1.** Tissue-specific expression of genes in Chinese fir wood-forming tissues.

**I,** Specific isolation of secondary phloem, xylem, cambial cells from Chinese fir trunks via the frozen laser microdissection method. Left panel, the overall structure of woody tissues in radial sections. Right panel, the anatomical structure of cambium (1), secondary xylem (2) and secondary phloem (3). The scale is 1:10. The dying of sections was by 0.1% toluidine blue solution. **II,** Tissue-specific expression of genes in Chinese fir wood-forming tissues. The reference gene was *60S* rRNA. a, b, c and d represented the difference in gene expression levels in secondary phloem tissues (**blue columns**) and cambium (**yellow columns**) compared to those in secondary xylem cells (**green columns**). a,  $p$ -value<0.001; b,  $0.05 < p$ -value < 0.01, c,  $0.01 < p$ -value < 0.05, d,  $p$ -value>0.05.

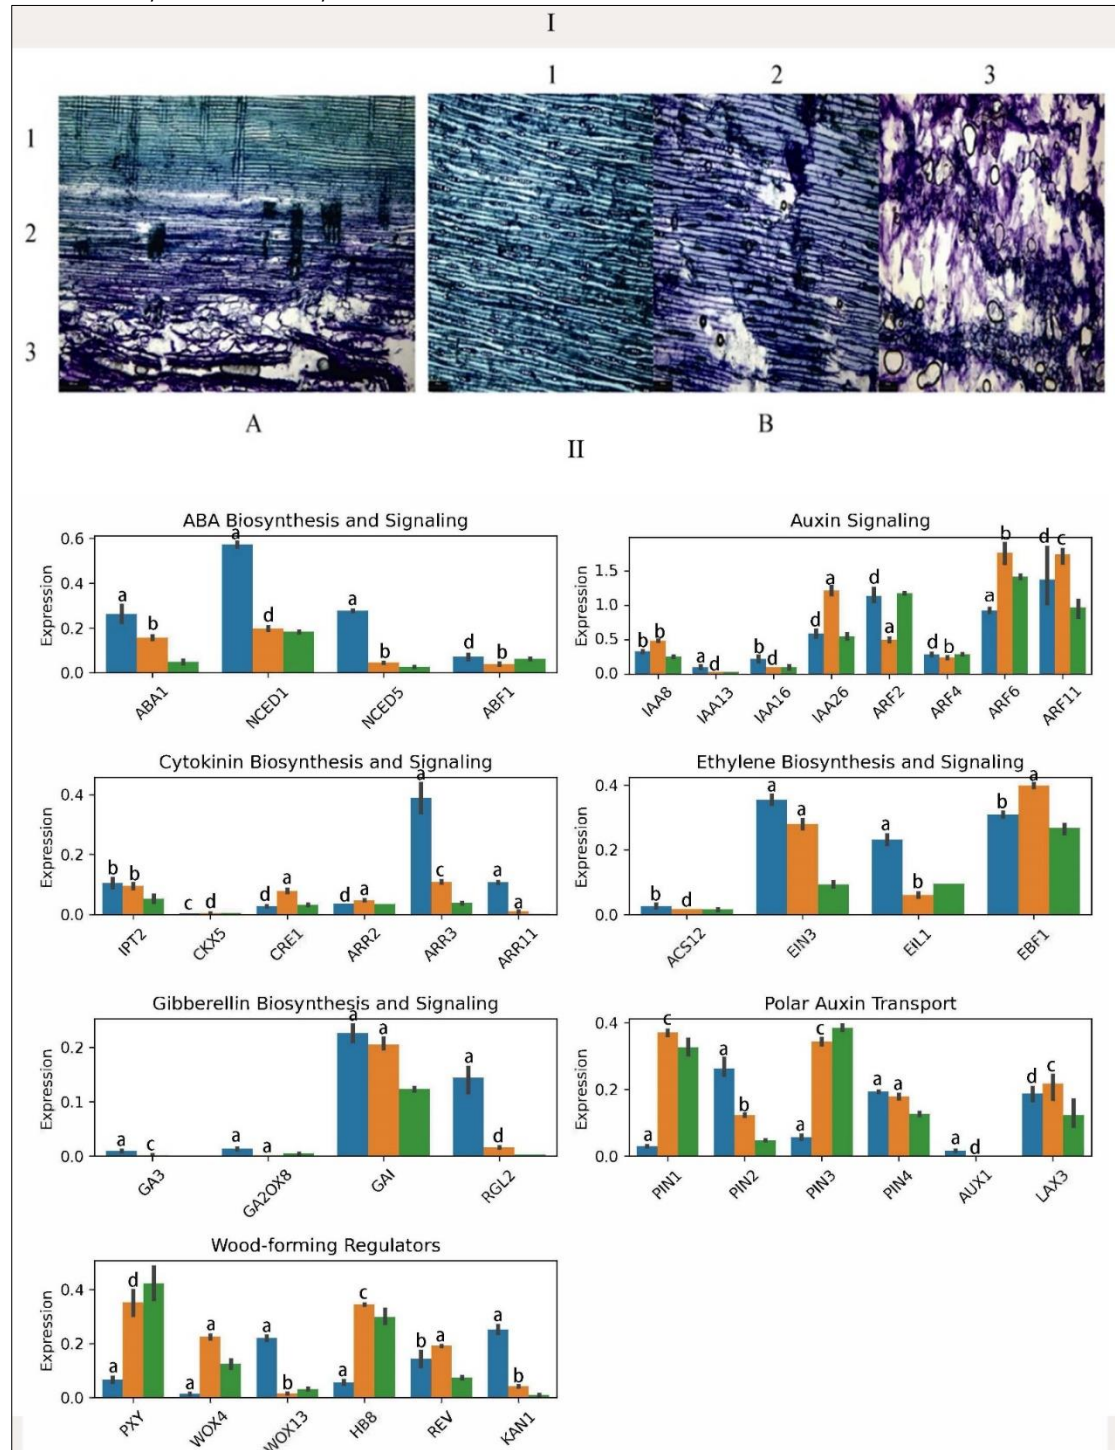

**Figure S2.** Expression profiles of genes related to ethylene biosynthesis and signaling in differently treated samples. a,  $p$ -value<0.001; b,  $0.05 < p$ -value <0.01, c,  $0.01 < p$ -value<0.05, d,  $p$ -value>0.05.

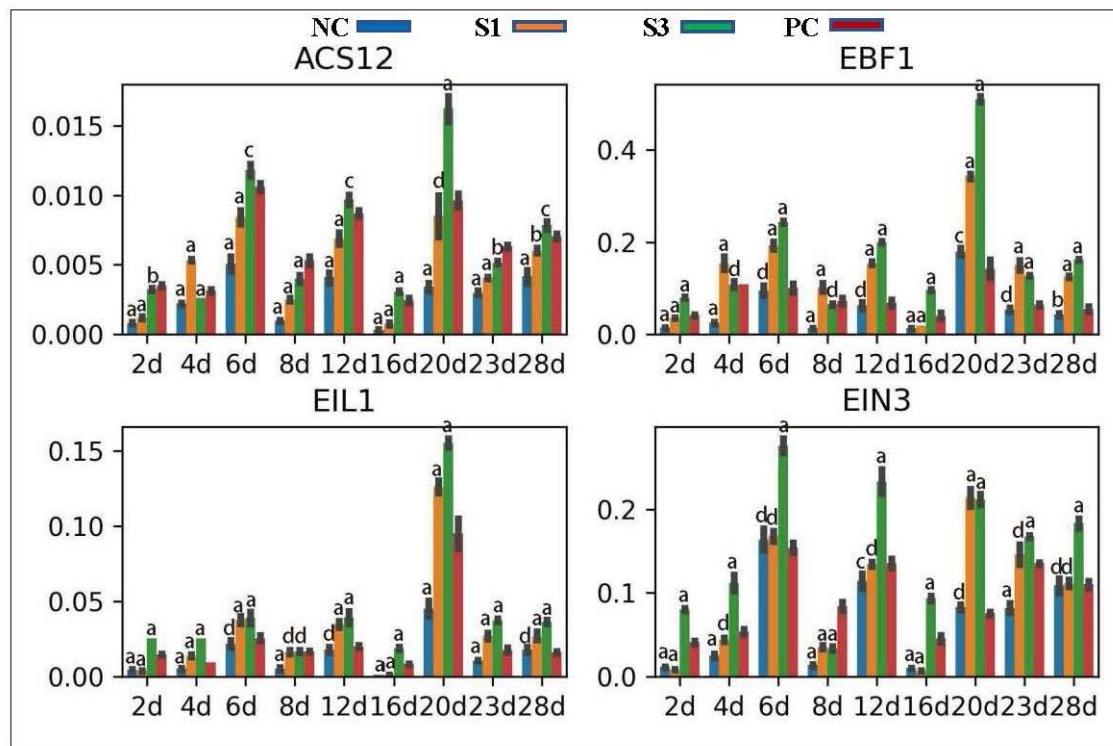

**Table S1.** Functional annotation and classification of selected genes

| Gene Name | Accession Number | Blastx E-value | Functional Annotation                   | qPCR Primers                                                                                  |
|-----------|------------------|----------------|-----------------------------------------|-----------------------------------------------------------------------------------------------|
| PIN1      | MW934397         | 4e-140         | PIN-FORMED 1                            | Forward primer:<br>TACTACTGCGCGGTTTGGAA<br>Reverse primer:<br>CATACCTCGGGAACCGTAAGC           |
| PIN2      | MW934398         | 0.0            | PIN-FORMED 2                            | Forward primer:<br>TTTGTCTGATGCCGGTCTTG<br>Reverse primer:<br>AAGTGGCAACGGATTTTCCA            |
| PIN3      | MW934399         | 0.0            | PIN-FORMED 3                            | Forward primer:<br>TACTACTGCGCGGTTTGGAA<br>Reverse primer:<br>CATACCTCGGGAACCGTAAGC           |
| PIN4      | MW934400         | 0.0            | PIN-FORMED 4                            | Forward primer:<br>GGAGCCGCGGAATGG<br>Reverse primer:<br>TCGCGAGGACTGCAAAGAAT                 |
| AUX1      | MW934387         | 0.0            | AUXIN RESISTANT 1                       | Forward primer:<br>GCTCCCCAAGTCAGCATTTTC<br>Reverse primer:<br>GCAAACCCAAAGGTAATGAACTG        |
| LAX3      | MW934396         | 0.0            | Like AUX1 3                             | Forward primer:<br>TTCAAATCAGGTAGCGCAGGTA<br>Reverse primer:<br>TGGAAGAGTATGCCAGACACCAT       |
| IAA8      | MW934388         | 3e-73          | Indole-3-acetic acid-induced protein 8  | Forward primer:<br>TTCGATCCTTCCGGTGTAATA<br>Reverse primer:<br>CAGCCTTTCCTTCACCCTCTT          |
| IAA13     | MW934390         | 1e-57          | Auxin-induced protein 13                | Forward primer:<br>TTGGCTTTGGAGGACATGTTC<br>Reverse primer:<br>TGCATAGGAATCTGCCCAGAA          |
| IAA16     | MW934392         | 3e-69          | Indole-3-acetic acid-induced protein 16 | Forward primer:<br>GACTACTGTGCTTGCTGATCCA<br>Reverse primer:<br>TGGCCACCCCAACAATCTG           |
| IAA26     | MW934393         | 4e-40          | Indole-3-acetic acid inducible 26       | Forward primer:<br>GCAGCTCTATTCCAGCTCAAAAC<br>Reverse primer:<br>CCGCTCAACACAGATGGGTGA        |
| ARF2      | MW934382         | 0.0            | Auxin response factor 2                 | Forward primer:<br>GATGCCACATGCACAAATCC<br>Reverse primer:<br>CAGCCTTCAATGGCTCTGACT           |
| ARF4      | MW934383         | 1e-157         | Auxin response factor 4                 | Forward primer:<br>TGTGCGCCCTTATGATGTTC<br>Reverse primer:<br>CCTGGTCTGCATGGAGATTCA           |
| ARF6      | MW934384         | 0.0            | Auxin response factor 6                 | Forward primer:<br>CTGGCCTTGGTGACTTGGA<br>Reverse primer:<br>TGTAATTCATCCCAACCAACCT           |
| ARF11     | MW934385         | 0.0            | Auxin response factor 11                | Forward primer:<br>CTACTTCTTGGTATCAGACGTGCAA<br>Reverse primer:<br>CCAATATGCATACTGTCACTGGATAG |

|                      |          |        |                                                    |                                                                                                 |
|----------------------|----------|--------|----------------------------------------------------|-------------------------------------------------------------------------------------------------|
|                      |          |        |                                                    | A                                                                                               |
| IPT2                 | MW934411 | 1e-128 | tRNA isopentenyl transferase 2                     | Forward primer:<br>AGCCGGCAAATCTCGTCTT<br>Reverse primer:<br>CGAGTCAGCGTTGAGGATCTC              |
| CKX5                 | MW934409 | 0.0    | Cytokinin oxidase 5                                | Forward primer:<br>GGAACGCTTTCTAATGCTGGAA<br>Reverse primer:<br>TGGAGCACGTTGCTGATCTG            |
| CRE1                 | MW934410 | 0.0    | Cytokinin response 1                               | Forward primer:<br>CACCTTTGCCGTCTACACTAAAGA<br>Reverse primer:<br>ACGGTGGCTTCCGTTCTCT           |
| ARR2                 | MW934406 | 4e-118 | Arabidopsis response regulator 2                   | Forward primer:<br>TTGCGAGTTTTAGTGGTTGATGA<br>Reverse primer:<br>GCCCCGAGAACATGTTGTAAGTTC       |
| ARR3                 | MW934407 | 1e-51  | Arabidopsis response regulator 3                   | Forward primer:<br>CAAGGCGTTGGAGGTGTTG<br>Reverse primer:<br>TGGCATACAGTAGTCTGTGATAATC<br>ATATT |
| ARR11                | MW934408 | 2e-55  | Arabidopsis response regulator 11                  | Forward primer:<br>GACGATCCCTTGTGCCTCAT<br>Reverse primer:<br>CGGGTACATGTTGTACGTTGT             |
| GA3                  | MW934420 | 6e-112 | GA requiring 3                                     | Forward primer:<br>ACGGTCATCAAGGAACTGACA<br>Reverse primer:<br>GCAGGTTTCCCAGGACAGGTA            |
| GA <sub>2</sub> ox 8 | MZ540759 | 1e-70  | Gibberellin 2-oxidase 8                            | Forward primer:<br>CAGGGAGGGAAAGTGGATCAT<br>Reverse primer:<br>GAGGTCGCCAACGTTGATG              |
| GAI                  | MW934423 | 2e-166 | Gibberellic acid insensitive                       | Forward primer:<br>GCGCCATGGGAAAGGTT<br>Reverse primer:<br>GTCCTGTGGAAGGAATCCGTAA               |
| RGL2                 | MZ540760 | 7e-56  | RGA-like 2                                         | Forward primer:<br>CTCGAGTTTGCTCAATCAATAGGA<br>Reverse primer:<br>CAGATTCATCCAGTTCTTCCATTTC     |
| ABA1                 | MW934375 | 0.0    | ABA deficient 1                                    | Forward primer:<br>AAGGATTTGAGCGCTGTGAGA<br>Reverse primer:<br>GGAGAGCAGCCAAGGCATT              |
| NCED 1               | MW934379 | 0.0    | Carotenoid cleavage dioxygenase 1                  | Forward primer:<br>GGTTGTCACAAAGGAGGGAATAA<br>Reverse primer:<br>ATTGCGAAGTCATGCATCATG          |
| NCED 5               | MW934381 | 0.0    | Nine-cis-epoxycarotenoid dioxygenase 5             | Forward primer:<br>TGCAGTCCGCCATGATAGC<br>Reverse primer:<br>GACATCGTAGCTCAGAGCGAAA             |
| ABF1                 | MW934376 | 1e-36  | Absciscic acid responsive element-binding factor 1 | Forward primer:<br>TGCACAGAGACAGGCCACAT<br>Reverse primer:<br>CAACTCCAGCTTTGACCAAGAA            |
| ACS12                | MW934377 | 3e-169 | 1-amino-                                           | Forward primer:                                                                                 |

|           |          |        |                                       |                                                                                                |
|-----------|----------|--------|---------------------------------------|------------------------------------------------------------------------------------------------|
|           |          |        | cyclopropane-1-carboxylate synthase12 | TGGCTGGCTGTTGTTAACCA<br>Reverse primer:<br>ATGCTCGTGGGTGGACAAG                                 |
| EIN3      | MW934430 | 2e-171 | Ethylene-insensitive3                 | Forward primer:<br>TGGCTGGCTGTTGTTAACCA<br>Reverse primer:<br>ATGCTCGTGGGTGGACAAG              |
| EIL1      | MW934429 | 2e-127 | Ethylene-insensitive3-like 1          | Forward primer:<br>TCAGAGACTGGAACATGAAAATAACAA<br>Reverse primer:<br>CTTGGGATGCTAGCTGTCTACTTCT |
| EBF1      | MW934428 | 3e-165 | EIN3-binding F box protein 1          | Forward primer:<br>TGCATCTTGATGGAGACATCATG<br>Reverse primer:<br>TTCGACTCTCCTTGCAGTACAAAG      |
| PXY       | MW934435 | 0.0    | Phloem-intercalated with xylem        | Forward primer:<br>ATGGAAGCATCCCCACCAAG<br>Reverse primer:<br>TGCCATGGAATCCCTCCAAC             |
| WOX4      | MW934436 | 3e-39  | WUSCHEL related homeobox 4            | Forward primer:<br>GCAGGCAATCAACAGCAACA<br>Reverse primer:<br>CGTTGGGTGTCCTCATTCCA             |
| WOX1<br>3 | MW934437 | 4e-44  | WUSCHEL related homeobox 13           | Forward primer:<br>CCCTTCTTCGCTTCCCAGTT<br>Reverse primer:<br>ATTGGAGTGGCTGTGCCTT              |
| HB8       | MW934440 | 0.0    | Homeobox-leucine zipper protein 8     | Forward primer:<br>CCGCTTGCAGAAGCAAGTTT<br>Reverse primer:<br>CGCGGTGTCAGATGGTTTTG             |
| REV       | MW934442 | 1e-91  | REVOLUTA                              | Forward primer:<br>TTTCTGCGGGAAAAGCGAAC<br>Reverse primer:<br>TTAACTGGCCGGGTCAAAGG             |
| KAN1      | MW934444 | 1e-47  | KANADI 1                              | Forward primer:<br>TGCAGGGTTCGATTTGTGGA<br>Reverse primer:<br>TGTGGAGGCGCTGATTCTT              |
